# Supplementary material
Source: PubMed Central journal article supplement (PMC7067676)

**Table S1.** Association between race/ethnicity and the composite outcome of waitlist registration or transplantation using Fine-Gray models.

| Waitlist or transplant<br>Overall cohort | Number of years after dialysis initiation        |                  |                  |                  |                  |                  |
|------------------------------------------|--------------------------------------------------|------------------|------------------|------------------|------------------|------------------|
|                                          | Year 0                                           | Year 1           | Year 2           | Year 3           | Year 4           | Year 5           |
| Unadjusted                               |                                                  |                  |                  |                  |                  |                  |
| Non-Hispanic White (Ref)                 | Ref                                              | Ref              | Ref              | Ref              | Ref              | Ref              |
| Non-Hispanic Black                       | 0.81 (0.80-0.82)                                 | 1.22 (1.18-1.26) | 1.84 (1.76-1.92) | 2.77 (2.61-2.93) | 4.17 (3.88-4.48) | 6.28 (5.76-6.84) |
| Hispanic                                 | 1.01 (0.99-1.04)                                 | 1.51 (1.46-1.57) | 2.25 (2.14-2.37) | 3.36 (3.14-3.59) | 5.01 (4.62-5.42) | 7.46 (6.78-8.21) |
| Adjusted <sup>a</sup>                    |                                                  |                  |                  |                  |                  |                  |
| Non-Hispanic White (Ref)                 | Ref                                              | Ref              | Ref              | Ref              | Ref              | Ref              |
| Non-Hispanic Black                       | 0.58 (0.57-0.60)                                 | 0.86 (0.83-0.89) | 1.26 (1.20-1.33) | 1.86 (1.75-1.98) | 2.74 (2.53-2.96) | 4.03 (3.68-4.42) |
| Hispanic                                 | 0.73 (0.71-0.74)                                 | 1.06 (1.02-1.10) | 1.55 (1.46-1.63) | 2.26 (2.10-2.43) | 3.30 (3.02-3.61) | 5.83 (4.35-5.36) |
| <b>Healthy cohort<br/>(N=239,248)</b>    | <b>Number of years after dialysis initiation</b> |                  |                  |                  |                  |                  |
| Unadjusted                               |                                                  |                  |                  |                  |                  |                  |
| Non-Hispanic White (Ref)                 | Ref                                              | Ref              | Ref              | Ref              | Ref              | Ref              |
| Non-Hispanic Black                       | 0.49 (0.48-0.50)                                 | 0.73 (0.70-0.76) | 1.08 (1.01-1.15) | 1.59 (1.47-1.73) | 2.36 (2.13-2.61) | 3.49 (3.09-3.94) |
| Hispanic                                 | 0.55 (0.51-0.59)                                 | 0.84 (0.77-0.92) | 1.29 (1.16-1.44) | 1.98 (1.74-2.25) | 3.04 (2.62-3.53) | 4.66 (3.93-5.52) |
| Adjusted <sup>a</sup>                    |                                                  |                  |                  |                  |                  |                  |
| Non-Hispanic White (Ref)                 | Ref                                              | Ref              | Ref              | Ref              | Ref              | Ref              |
| Non-Hispanic Black                       | 0.50 (0.49-0.52)                                 | 0.73 (0.70-0.76) | 1.06 (1.00-1.13) | 1.54 (1.42-1.68) | 2.24 (2.02-2.48) | 3.25 (2.88-3.68) |
| Hispanic                                 | 0.59 (0.57-0.61)                                 | 0.88 (0.84-0.93) | 1.32 (1.23-1.42) | 1.98 (1.81-2.17) | 2.97 (2.66-3.32) | 4.45 (3.90-5.08) |

<sup>a</sup>Adjusted for age at ESRD onset (whichever is first), sex, median income by neighborhood zip code, insurance status, and region of the US, BMI, CAD, cerebrovascular disease, heart failure, diabetes, hypertension, tobacco, alcohol, and drug dependence, ESRD network, and calendar year of initiation.

Figure S1. Cohort Derivation

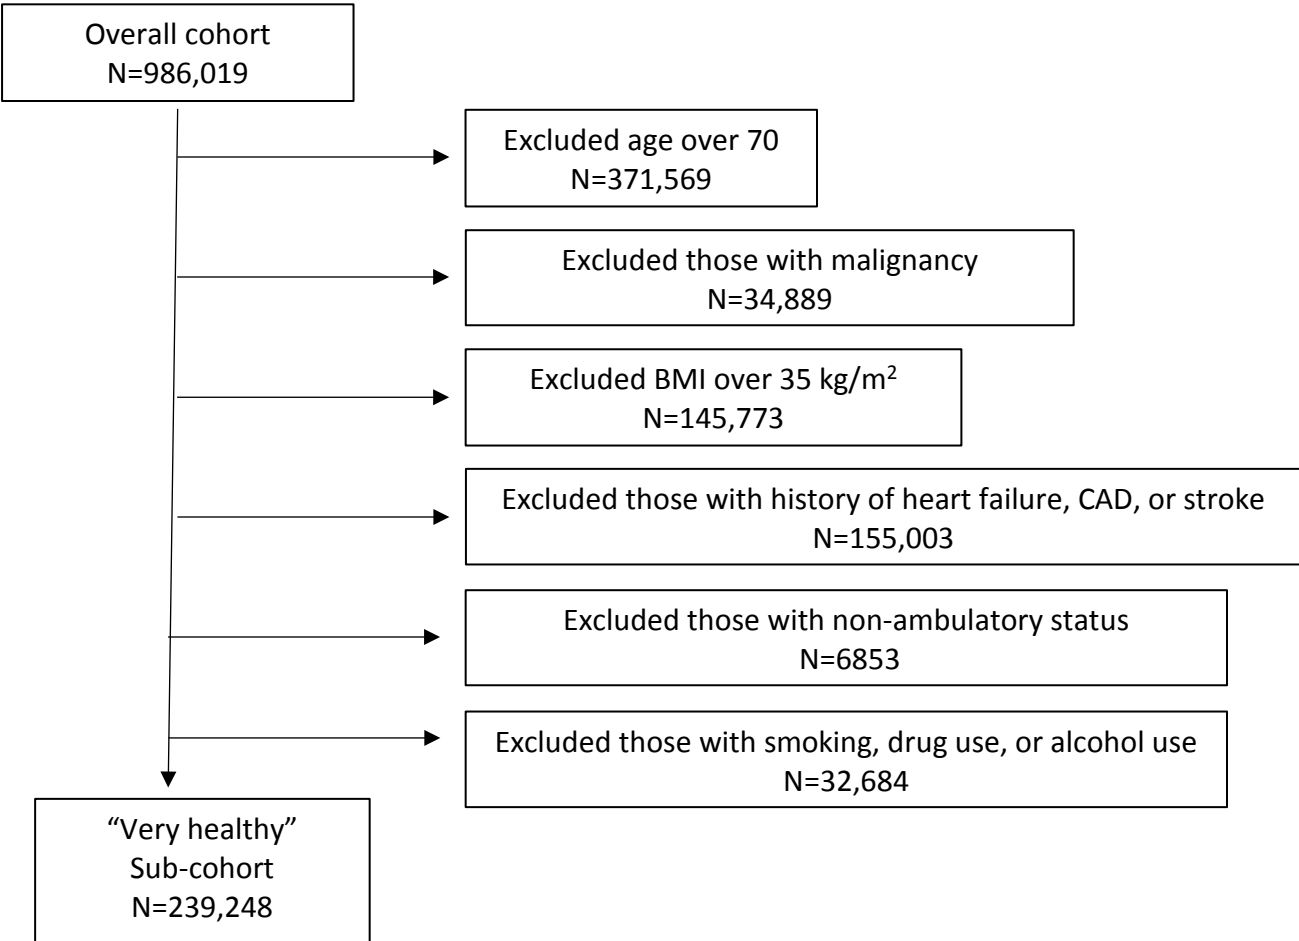

Supplement: NIHMS1548927-supplement-Supplemental_Digital_Content_FINAL.pdf [file NIHMS1548927-supplement-Supplemental_Digital_Content_FINAL.pdf]
